# Supplementary material for: Architectured design of superparamagnetic Fe3O4nanoparticles for application as MRI contrast agents: mastering size and magnetism for enhanced relaxivity
Source: Royal Society of Chemistry journal article supplement (doi:10.1039/c5tb00789e), 2015-01-01

## **Supplementary Information**

### **Architected Design of High-Performance Superparamagnetic Fe<sub>3</sub>O<sub>4</sub> Nanoparticles for Application as MRI Contrast Agents**

Clara Pereira, André M. Pereira, Mariana Rocha, Cristina Freire and Carlos F. G. C.

Geraldes

**Figure S1.** Particle size distribution histograms of (A) Fe\_TIPA, (B) Fe\_DEA and (C) Fe\_TEA nanomaterials. The solid line represents the log-normal distribution fit.

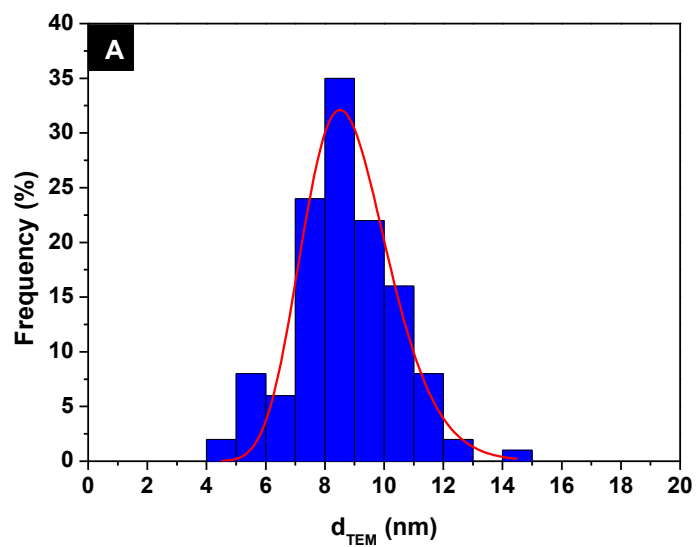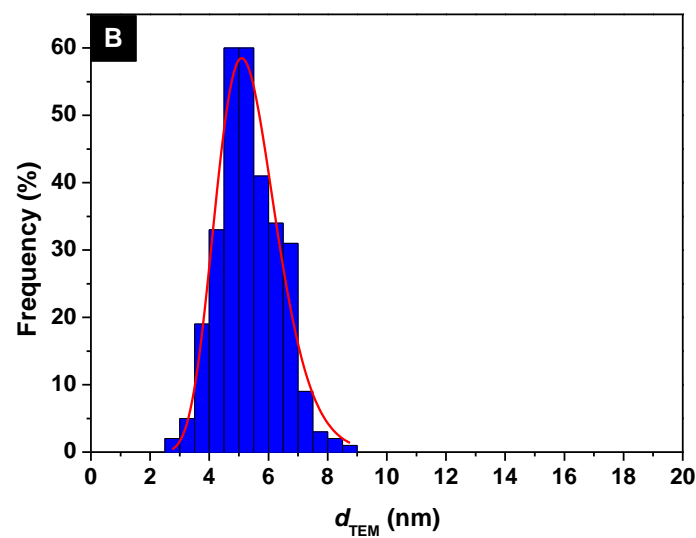

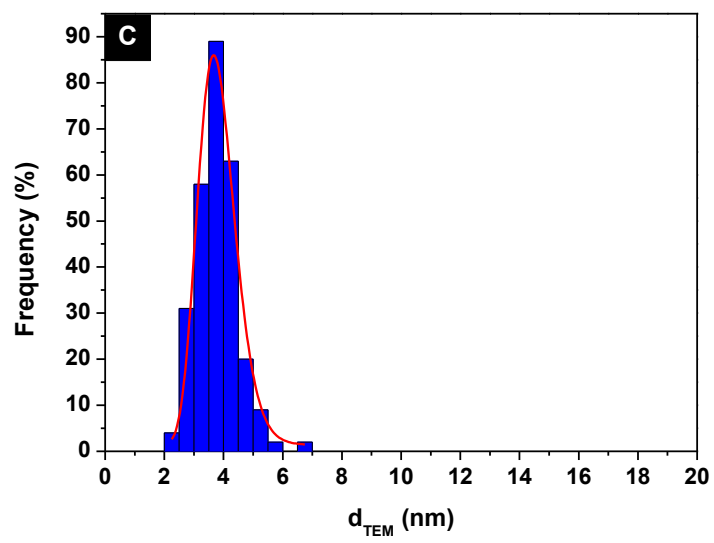

**Figure S2.** SAED patterns of (A) Fe\_TIPA, (B) Fe\_DEA and (C) Fe\_TEA nanomaterials.

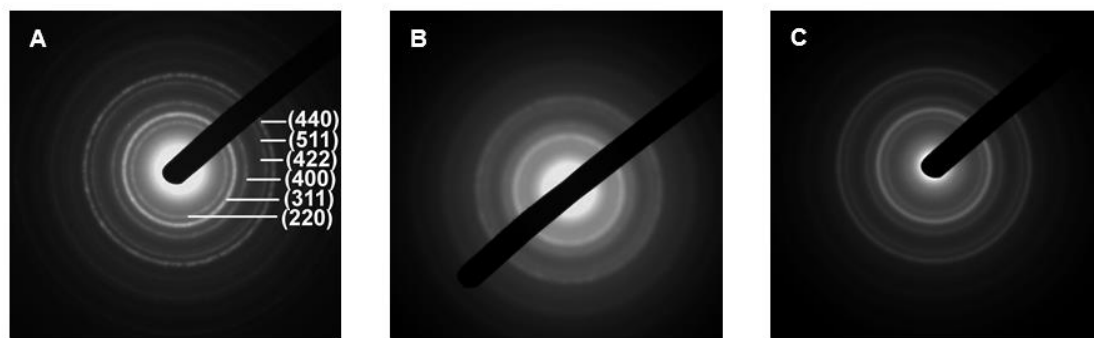

**Figure S3.** Hydrodynamic size distribution of Fe\_TEA aqueous dispersion obtained by DLS, before relaxometry studies and after 6 months. Inset: Photography of the Fe\_TEA colloidal dispersion and corresponding TEM image.

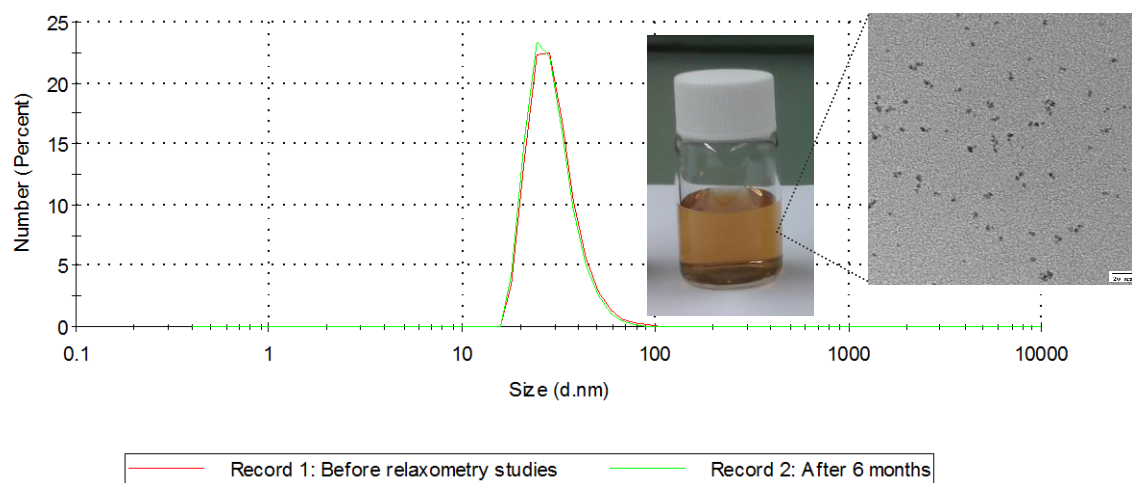

**Figure S4.** Thermogravimetric curves of the iron oxide nanomaterials performed under N<sub>2</sub> atmosphere.

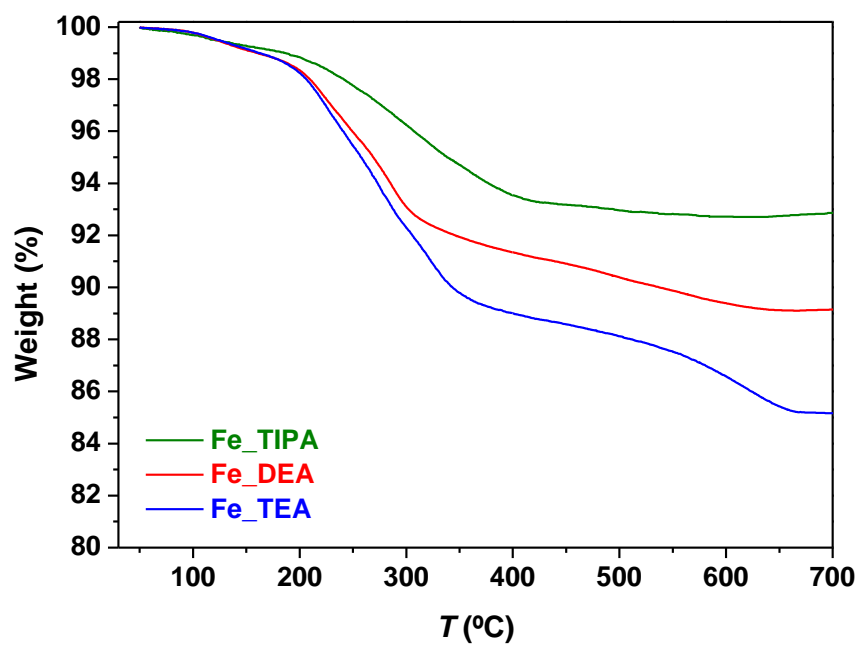

Supplement: c5tb00789e1.pdf [file c5tb00789e1.pdf]
